# Supplementary material for: Impacts of muscle mass dynamics on prognosis of outpatients with cirrhosis
Source: PubMed Central journal article supplement — Clin Mol Hepatol. 2022 Sep 19;28(4):876–89. doi: 10.3350/cmh.2022.0231 (PMC9597226; doi:10.3350/cmh.2022.0231), 2022-09-19
Supplement: cmh-2022-0231-suppl1.pdf [file cmh-2022-0231-suppl1.pdf]

**Supplementary Table 1.** Comparison of included and excluded participants

| Variable                                | Included (n=595)  | Excluded (n=126)  | P-value |
|-----------------------------------------|-------------------|-------------------|---------|
| Age (years)                             | 55.4 (49.5, 59.8) | 55.3 (50.1, 60.8) | 0.46    |
| Male                                    | 381 (64.0)        | 83 (65.9)         | 0.77    |
| BMI (kg/m <sup>2</sup> )                | 24.6 (22.6, 27.2) | 24.5 (22.1, 27.1) | 0.54    |
| Hypertension                            | 139 (23.4)        | 31 (24.6)         | 0.86    |
| Diabetes mellitus                       | 163 (27.4)        | 31 (24.6)         | 0.60    |
| Alcohol-related                         | 144 (24.2)        | 39 (31.0)         | 0.14    |
| Hepatitis B                             | 357 (60.0)        | 64 (50.8)         | 0.07    |
| Hepatitis C                             | 43 (7.2)          | 14 (11.1)         | 0.20    |
| Platelets ( $\times 10^3/\text{mm}^3$ ) | 127 (85, 169)     | 126 (78, 168)     | 0.87    |
| Albumin (g/dL)                          | 4.4 (4.0, 4.7)    | 4.4 (4.0, 4.7)    | 0.91    |
| AST (U/L)                               | 31 (24, 44)       | 33 (26, 45)       | 0.10    |
| ALT (U/L)                               | 24 (18, 35)       | 25 (16, 33)       | 0.95    |
| Bilirubin (mg/dL)                       | 0.89 (0.65, 1.35) | 0.83 (0.59, 1.34) | 0.36    |
| Prothrombin time (INR)                  | 1.09 (1.03, 1.17) | 1.08 (1.04, 1.19) | 0.69    |
| Creatinine (mg/dL)                      | 0.80 (0.69, 0.92) | 0.78 (0.66, 0.89) | 0.13    |
| Sodium (mmol/L)                         | 141 (140, 143)    | 141 (139, 143)    | 0.21    |
| Ascites                                 | 59 (9.9)          | 16 (12.7)         | 0.37    |
| Overt encephalopathy                    | 1 (0.2)           | 1 (0.8)           | 0.45    |
| Child-Pugh score                        | 5 (5, 5)          | 5 (5, 5)          | 0.77    |
| Child-Pugh class, B/C                   | 64 (10.8)         | 20 (15.9)         | 0.15    |
| MELD-Na score                           | 8 (7, 10)         | 8 (7, 10)         | 0.17    |
| SMI (cm <sup>2</sup> /m <sup>2</sup> )  | 53.1 (46.1, 60.5) | 52.8 (45.3, 59.6) | 0.36    |
| Sarcopenia                              | 139 (23.4)        | 30 (23.8)         | 0.99    |

Values are expressed as number (%) or median (interquartile range).

The excluded patients did not include patients who withdrew consent.

BMI, body mass index; AST, aspartate aminotransferase; ALT, alanine aminotransferase; INR, international normalized ratio; eGFR, estimated glomerular filtration rate; MELD, model for end-stage liver disease; SMI, skeletal muscle index.
