# Supplementary material for: Impacts of muscle mass dynamics on prognosis of outpatients with cirrhosis
Source: PubMed Central journal article supplement — Clin Mol Hepatol. 2022 Sep 19;28(4):876–89. doi: 10.3350/cmh.2022.0231 (PMC9597226; doi:10.3350/cmh.2022.0231), 2022-09-19
Supplement: cmh-2022-0231-suppl2.pdf [file cmh-2022-0231-suppl2.pdf]

**Supplementary Table 2.** Characteristics of patients based on sarcopenia status at inclusion

| Variable                                       | Without sarcopenia (n=486) | With sarcopenia (n=109) | P-value |
|------------------------------------------------|----------------------------|-------------------------|---------|
| Age (years)                                    | 55.3 (49.5, 60.2)          | 56.2 (49.9, 59.2)       | 0.73    |
| Male                                           | 296 (60.9)                 | 85 (78.0)               | <0.01   |
| BMI (kg/m <sup>2</sup> )                       | 25.2 (23.4, 27.7)          | 21.1 (19.5, 23.4)       | <0.01   |
| Hypertension                                   | 117 (24.1)                 | 22 (20.2)               | 0.46    |
| Diabetes mellitus                              | 136 (28.0)                 | 27 (24.8)               | 0.58    |
| Alcohol-related                                | 102 (21.0)                 | 42 (38.5)               | <0.01   |
| Hepatitis B                                    | 291 (59.9)                 | 66 (60.6)               | 0.98    |
| Hepatitis C                                    | 39 (8.0)                   | 4 (3.7)                 | 0.17    |
| Platelets (×10 <sup>3</sup> /mm <sup>3</sup> ) | 126 (84, 172)              | 132 (90, 160)           | 0.87    |
| Albumin (g/dL)                                 | 4.4 (4.0, 4.7)             | 4.4 (4.0, 4.6)          | 0.58    |
| AST (U/L)                                      | 31 (24, 43)                | 32 (24, 48)             | 0.65    |
| ALT (U/L)                                      | 24 (18, 35)                | 22 (14, 30)             | 0.01    |
| Bilirubin (mg/dL)                              | 0.80 (0.66, 1.33)          | 0.93 (0.65, 1.42)       | 0.54    |
| Prothrombin time (INR)                         | 1.09 (1.03, 1.17)          | 1.10 (1.04, 1.18)       | 0.20    |
| Creatinine (mg/dL)                             | 0.82 (0.69, 0.93)          | 0.77 (0.69, 0.89)       | 0.09    |
| eGFR (mL/min/1.73 m <sup>2</sup> )             | 89.3 (78.5, 103.5)         | 97.7 (82.9, 113.1)      | <0.01   |
| Sodium (mmol/L)                                | 141 (140, 143)             | 141 (140, 143)          | 0.92    |
| Ascites                                        | 42 (8.6)                   | 17 (15.6)               | 0.04    |
| Overt encephalopathy                           | 0 (0.0)                    | 1 (0.9)                 | 0.41    |
| Child-Pugh score                               | 5 (5, 5)                   | 5 (5, 5)                | 0.77    |
| Child-Pugh class, B/C                          | 48 (9.9)                   | 16 (14.7)               | 0.20    |
| MELD-Na score                                  | 8 (7, 10)                  | 8 (7, 10)               | 0.22    |
| SMI (cm <sup>2</sup> /m <sup>2</sup> )         | 55.6 (50.1, 62.1)          | 43.7 (38.7, 47.4)       | <0.01   |
| ΔSMI/yr% (%)                                   | -0.28 (-3.09, 2.36)        | 0.87 (-3.11, 4.59)      | 0.04    |

Values are expressed as number (%) or median (interquartile range).

Continuous and categorical variables were compared using the Mann-Whitney test and chi-squared test, respectively.

BMI, body mass index; AST, aspartate aminotransferase; ALT, alanine aminotransferase; INR, international normalized ratio; eGFR, estimated glomerular filtration rate; MELD, model for end-stage liver disease; SMI, skeletal muscle index; ΔSMI/yr%, % change in SMI after 1 year.
