# Supplementary material for: Impacts of muscle mass dynamics on prognosis of outpatients with cirrhosis
Source: PubMed Central journal article supplement — Clin Mol Hepatol. 2022 Sep 19;28(4):876–89. doi: 10.3350/cmh.2022.0231 (PMC9597226; doi:10.3350/cmh.2022.0231), 2022-09-19
Supplement: cmh-2022-0231-suppl3.pdf [file cmh-2022-0231-suppl3.pdf]

**Supplementary Table 3.** Univariate and multivariate competing risk analyses for the development of LC complication after 1-year CT

| Variable                               | Univariate         |         | Multivariable    |         |                  |         |
|----------------------------------------|--------------------|---------|------------------|---------|------------------|---------|
|                                        | SHR (95% CI)       | P-value | aSHR (95% CI)    | P-value | aSHR (95% CI)    | P-value |
| Age (years)                            | 1.02 (0.99–1.05)   | 0.27    |                  |         |                  |         |
| Gender, male                           | 1.05 (0.67–1.65)   | 0.82    |                  |         |                  |         |
| BMI (kg/m <sup>2</sup> )               | 0.95 (0.88–1.03)   | 0.21    |                  |         |                  |         |
| HTN                                    | 1.77 (1.15–2.74)   | 0.01    | 2.02 (1.23–3.31) | <0.01   | 1.90 (1.20–3.00) | <0.01   |
| DM                                     | 1.81 (1.18–2.76)   | <0.01   | 1.17 (0.71–1.93) | 0.54    | 1.12 (0.70–1.79) | 0.65    |
| Alcohol-related                        | 4.45 (2.91–6.78)   | <0.01   | 2.00 (1.25–3.23) | <0.01   | 2.24 (1.43–3.51) | <0.01   |
| Hepatitis B                            | 0.20 (0.13–0.33)   | <0.01   | 0.36 (0.20–0.66) | <0.01   | 0.33 (0.18–0.59) | <0.01   |
| Hepatitis C                            | 0.48 (0.15–1.49)   | 0.20    |                  |         |                  |         |
| Platelets (10 <sup>9</sup> /L)         | 0.99 (0.98–0.99)   | <0.01   | 1.00 (0.99–1.00) | 0.09    | 0.99 (0.99–1.00) | <0.01   |
| Albumin (g/dL)                         | 0.14 (0.10–0.20)   | <0.01   | 0.34 (0.18–0.63) | <0.01   | 0.33 (0.18–0.60) | <0.01   |
| AST (U/L)                              | 1.01 (1.00–1.01)   | <0.01   | 1.01 (1.00–1.01) | <0.01   | 1.00 (1.00–1.01) | <0.01   |
| ALT (U/L)                              | 1.01 (1.00–1.01)   | <0.01   | 0.99 (0.98–1.00) | 0.08    | 0.99 (0.99–1.00) | 0.04    |
| Bilirubin (mg/dL)                      | 1.67 (1.39–2.01)   | <0.01   | 0.98 (0.75–1.27) | 0.88    |                  |         |
| Prothrombin time (INR)                 | 17.86 (9.38–34.16) | <0.01   | 0.81 (0.21–3.14) | 0.76    |                  |         |
| Creatinine (mg/dL)                     | 0.50 (0.12–2.16)   | 0.35    |                  |         |                  |         |
| eGFR (mL/min/1.73 m <sup>2</sup> )     | 1.01 (1.00–1.03)   | 0.04    | 1.00 (0.99–1.01) | 0.94    | 1.00 (0.99–1.01) | 0.75    |
| Sodium (mmol/L)                        | 0.82 (0.77–0.87)   | <0.01   | 0.97 (0.89–1.06) | 0.49    | 0.93 (0.86–1.01) | 0.07    |
| Ascites                                | 11.78 (7.24–19.10) | <0.01   | 1.99 (0.92–4.32) | 0.08    |                  |         |
| Child-Pugh score                       | 1.76 (1.60–1.94)   | <0.01   |                  |         | 1.35 (1.18–1.56) | <0.01   |
| Child-Pugh class, B/C                  | 10.62 (6.69–16.85) | <0.01   |                  |         |                  |         |
| MELD-Na score                          | 1.25 (1.20–1.31)   | <0.01   |                  |         | 0.99 (0.91–1.08) | 0.84    |
| Sarcopenia                             | 1.30 (0.77–2.19)   | 0.33    |                  |         |                  |         |
| SMI (cm <sup>2</sup> /m <sup>2</sup> ) | 0.98 (0.96–1.01)   | 0.18    |                  |         |                  |         |
| ΔSMI/yr% (%)                           | 0.95 (0.93–0.97)   | <0.01   | 0.96 (0.92–0.99) | <0.01   | 0.96 (0.93–0.99) | <0.01   |

The values of variables derived from the data at 1-year CT.

Model 1, multivariable Cox regression analysis with HTN, DM, alcohol, hepatitis B, platelet count, albumin, AST, ALT, bilirubin, INR, eGFR, sodium, presence of ascites, and ΔSMI/yr%, which showed *P*<0.10 in univariate analyses, except for the conventional prognostic models including Child-Pugh and MELD-Na scores; model 2, multivariable Cox regression analysis with model 1 and Child-Pugh score but excluding the components of Child-Pugh score; model 3, multivariable Cox regression analysis with model 1 and MELD-Na score, but excluding the components of the MELD-Na score.

LT, liver transplantation; CT, computed tomography; SHR, sub-distribution hazard ratio; CI, confidence interval; aSHR, adjusted sub-distribution hazard ratio; BMI, body mass index; HTN, hypertension; DM, diabetes mellitus; AST, aspartate aminotransferase; ALT, alanine aminotransferase; INR, international normalized ratio; eGFR, estimated glomerular filtration rate; MELD, model for end-stage liver disease; SMI, skeletal muscle index; ΔSMI/yr%, % change in SMI after 1 year.
