# Supplementary material for: Impacts of muscle mass dynamics on prognosis of outpatients with cirrhosis
Source: PubMed Central journal article supplement — Clin Mol Hepatol. 2022 Sep 19;28(4):876–89. doi: 10.3350/cmh.2022.0231 (PMC9597226; doi:10.3350/cmh.2022.0231), 2022-09-19
Supplement: cmh-2022-0231-suppl4.pdf [file cmh-2022-0231-suppl4.pdf]

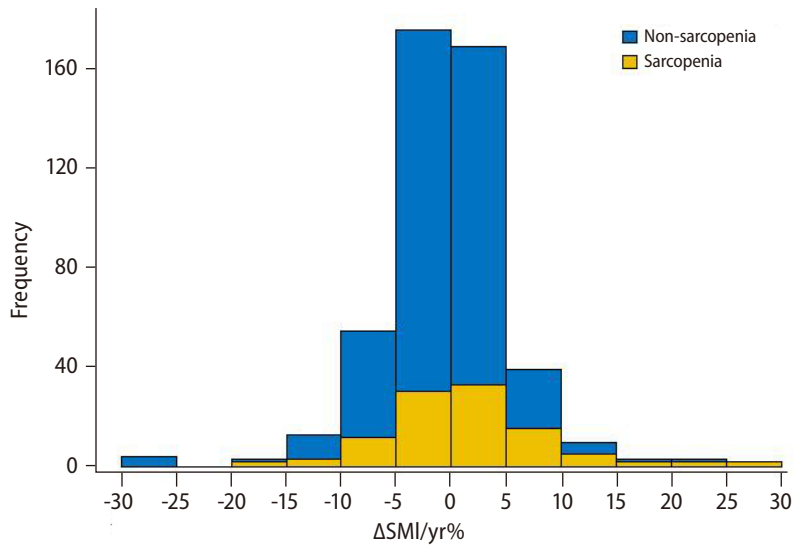

**Supplementary Figure 1.** Calibration plot of CLIF-SOFA scores. Diagonal line is the line of perfect calibration. Dots represent the intersects of observed and expected values for the risk of mortality, and bars represent the 95% confidence interval of the observed probability. Blue line indicates the calibration trend; since this line is close to the diagonal line, it indicates that the CLIF-SOFA fits the data well. CLIF-SOFA, Chronic Liver Failure-Sequential Organ Failure Assessment;  $\Delta$ SMI/yr%, % change in SMI after 1 year.
