# Supplementary material for: Impacts of muscle mass dynamics on prognosis of outpatients with cirrhosis
Source: PubMed Central journal article supplement — Clin Mol Hepatol. 2022 Sep 19;28(4):876–89. doi: 10.3350/cmh.2022.0231 (PMC9597226; doi:10.3350/cmh.2022.0231), 2022-09-19
Supplement: cmh-2022-0231-suppl5.pdf [file cmh-2022-0231-suppl5.pdf]

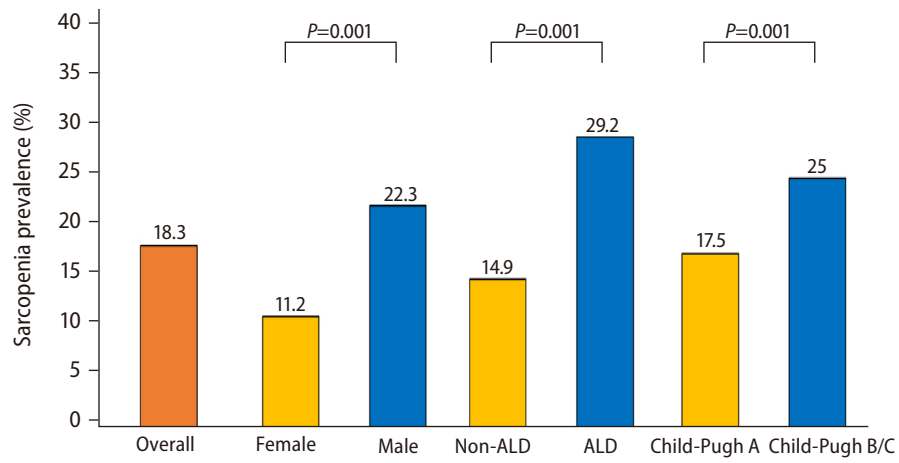

**Supplementary Figure 2.** Prevalence of sarcopenia according to various conditions at inclusion. ALD, alcoholic liver disease.
