# Supplementary material for: Impacts of muscle mass dynamics on prognosis of outpatients with cirrhosis
Source: PubMed Central journal article supplement — Clin Mol Hepatol. 2022 Sep 19;28(4):876–89. doi: 10.3350/cmh.2022.0231 (PMC9597226; doi:10.3350/cmh.2022.0231), 2022-09-19
Supplement: cmh-2022-0231-suppl6.pdf [file cmh-2022-0231-suppl6.pdf]

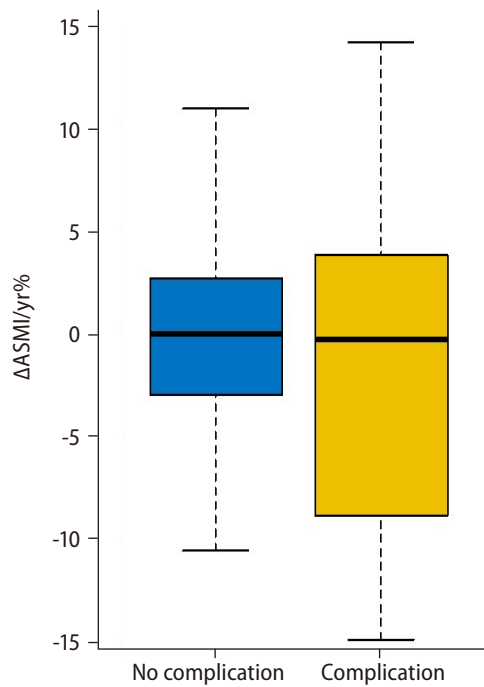

**Supplementary Figure 3.** Change of SMI according to the presence of cirrhosis complications between 6–12 months. The  $\Delta\text{SMI}/\text{yr}\%$  was not significantly different between patients with and without previous liver cirrhosis complications within 6 months prior to the 1 year ( $P=0.46$ ).  $\Delta\text{SMI}/\text{yr}\%$ , % change in skeletal muscle index after 1 year; SMI, skeletal muscle index.
