# Supplementary material for: Impacts of muscle mass dynamics on prognosis of outpatients with cirrhosis
Source: PubMed Central journal article supplement — Clin Mol Hepatol. 2022 Sep 19;28(4):876–89. doi: 10.3350/cmh.2022.0231 (PMC9597226; doi:10.3350/cmh.2022.0231), 2022-09-19
Supplement: cmh-2022-0231-suppl7.pdf [file cmh-2022-0231-suppl7.pdf]

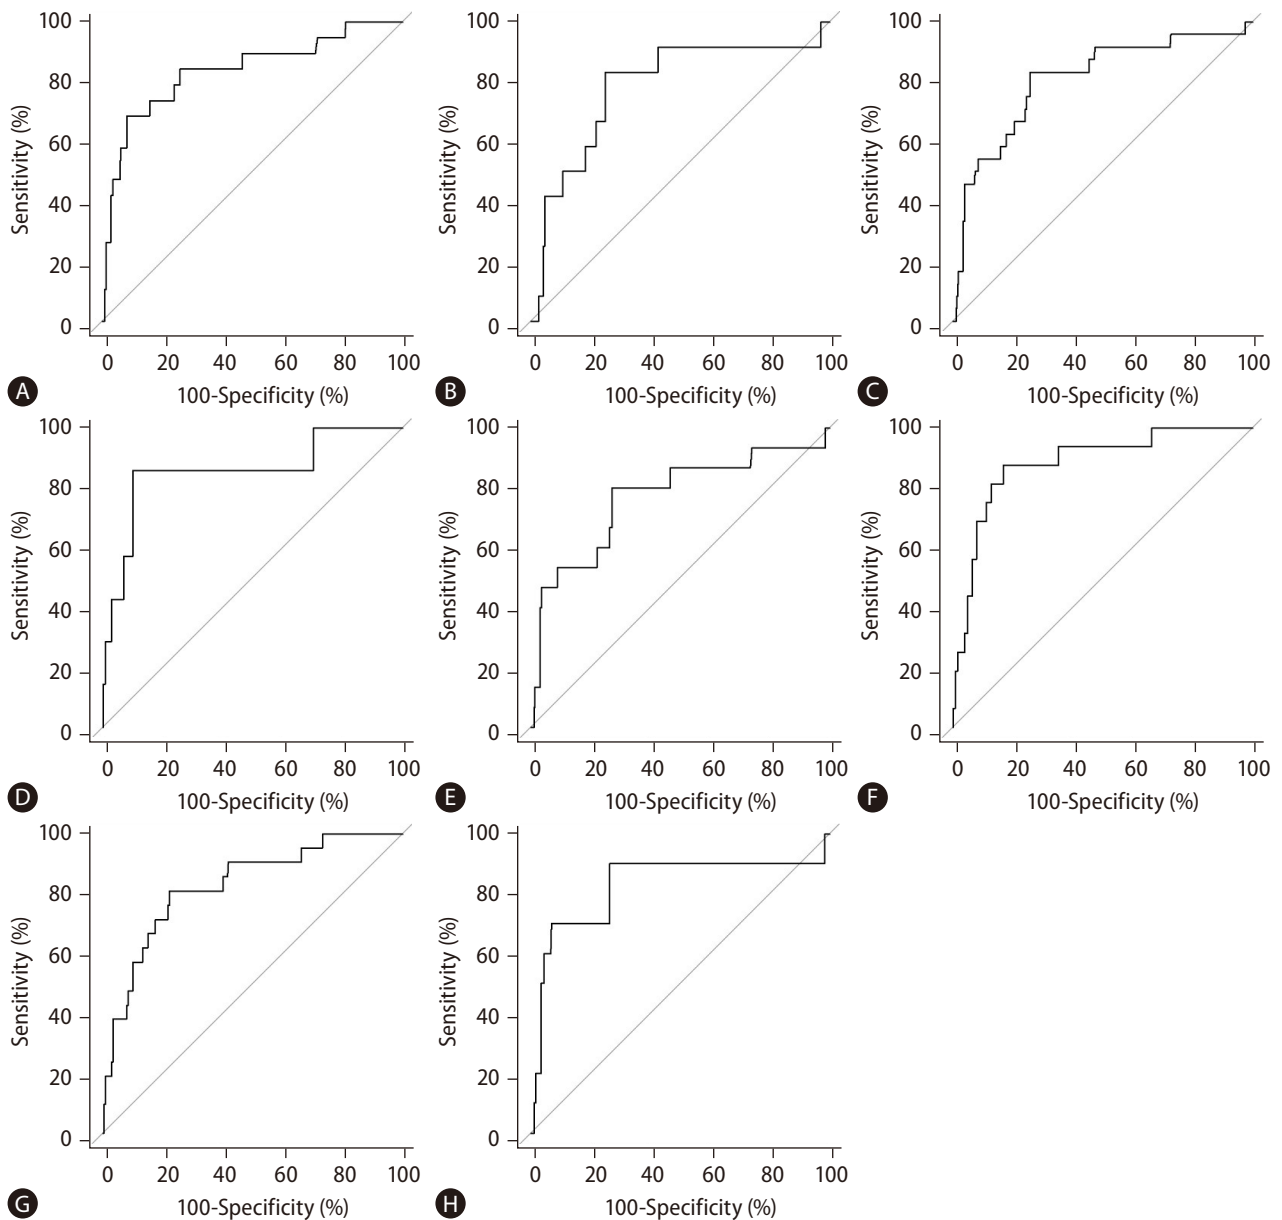

**Supplementary Figure 4.** Receiver operating characteristic curve of  $\Delta$ SMI/yr% for development of cirrhosis complication within 6 months after the 1-year follow-up in eight subgroups. (A) In men, the AUROC of  $\Delta$ SMI/yr% was 0.836, and the optimal cut-off was -5.74, with a sensitivity of 68.4% and specificity of 91.9%. (B) AUROCs, optimal cut-offs, sensitivities, and specificities were 0.783, -2.62, 83.3%, and 75.1% in women; (C) 0.807, -2.62, 83.3%, and 74.3% in non-sarcopenia at inclusion; (D) 0.856, -5.74, 85.7%, and 90.1% in sarcopenia at inclusion; (E) 0.767, -2.62, 80.0%, and 72.9% in non-alcoholic etiology; (F) 0.883, -2.82, 87.5%, and 83.2% in alcohol etiology; (G) 0.827, -2.74, 81.0%, and 77.8% in non-HBV etiology; and (H) 0.824, -2.62, 90.0%, and 73.6% in HBV etiology.  $\Delta$ SMI/yr%, % change in skeletal muscle index after 1 year; AUROC, area under the receiver operating characteristic curve; HBV, hepatitis B virus.
